# Supplementary material for: Educational interventions to improve literature searching skills in the health sciences: a scoping review
Source: PubMed Central journal article supplement (PMC7524628; doi:10.5195/jmla.2020.954), 2020-10-01
Supplement: jmla-108-4-534-s01.pdf [file jmla-108-4-534-s01.pdf]

## Educational interventions to improve literature searching skills in the health sciences: a scoping review

Julian Hirt; Thomas Nordhausen; Jasmin Meichlinger; Volker Braun; Adelheid Zeller; Gabriele Meyer

### APPENDIX A

#### Search components and search terms

| Component    | Term                                                                                                                                                                                                                                                                                                                                                                                             |
|--------------|--------------------------------------------------------------------------------------------------------------------------------------------------------------------------------------------------------------------------------------------------------------------------------------------------------------------------------------------------------------------------------------------------|
| Intervention | Education*<br>Teaching*†<br>Program<br>Programme<br>Material<br>Teaching Materials*<br>Flyer<br>Support<br>Help<br>Manuals as Topic*<br>Manual<br>Course<br>Curriculum*<br>Training<br>Coaching<br>Mentoring*<br>Mentorship<br>Guide<br>Guidance<br>Guideline<br>Study Guide as Topic*<br>Instruction<br>Information<br>Consulting<br>Consultation<br>Schooling<br>Learning<br>Exercise<br>Tutor |

| Component           | Term                                                                                                                                                                                                                                                                                                                   |
|---------------------|------------------------------------------------------------------------------------------------------------------------------------------------------------------------------------------------------------------------------------------------------------------------------------------------------------------------|
|                     | Scholarship<br>Library Services*<br>Peer Review*<br>Peer Group*                                                                                                                                                                                                                                                        |
| Aim of Intervention | Promotion<br>Improvement<br>Quality Improvement*<br>Increase<br>Enhancement<br>Development<br>Evolution<br>Evaluation<br>Upgrade<br>Success<br>Competence<br>Skills<br>Expertise<br>Competency<br>Ability<br>Educational Measurement*<br>Advance<br>Advancement<br>Benefit<br>Gain<br>Progress<br>Achievement<br>Boost |
| Literature search   | Databases as Topic*<br>Databases, Bibliographic*†<br>Bibliography as Topic*<br>Database<br>Database search<br>Database searching<br>Information Literacy*<br>Search Engine*<br>Literature search                                                                                                                       |

| Component       | Term                                                                                                                                                                                                                                                                                                                                                                                                                                                                                |
|-----------------|-------------------------------------------------------------------------------------------------------------------------------------------------------------------------------------------------------------------------------------------------------------------------------------------------------------------------------------------------------------------------------------------------------------------------------------------------------------------------------------|
|                 | Literature searching<br>Information Services*†<br>Search result<br>Search strategy<br>Search string<br>Search process<br>Information search<br>Information searching<br>Information seeking<br>Information Seeking Behavior*<br>Information finding<br>Literacy skills                                                                                                                                                                                                              |
| Health sciences | Health Personnel*<br>Libraries*<br>Libraries, Dental*†<br>Libraries, Digital*†<br>Libraries, Hospital*†<br>Libraries, Medical*†<br>National Library of Medicine (U.S.)*†<br>Libraries, Nursing*†<br>Libraries, Special*†<br>Health Occupation*<br>Students*<br>Allied Health Personnel*†<br>Health<br>Health professionals<br>Library<br>Librarian<br>Information specialist<br>Nurses*†<br>Nursing Staff*†<br>Nursing*<br>Nursing Research*<br>Medicine<br>Medical<br>Physicians*† |

| Component | Term                                                                                                                                                                                                                                                                                                                                                                                                        |
|-----------|-------------------------------------------------------------------------------------------------------------------------------------------------------------------------------------------------------------------------------------------------------------------------------------------------------------------------------------------------------------------------------------------------------------|
|           | Doctor<br>Clinician<br>Graduate<br>Undergraduate<br>Physical Therapists*†<br>Physical therapy<br>Physiotherapy<br>Physiotherapist<br>Midwifery*<br>Midwife<br>Therapy<br>Therapist<br>Occupational Therapists*†<br>Speech Therapy*<br>Paramedic<br>Psychology*<br>Psychologist<br>Psychotherapy*<br>Psychotherapist<br>Pharmacy*<br>Pharmacist*†<br>Health Science<br>Health Scientist<br>Health Researcher |
| Design    | Controlled Clinical Trials as Topic*<br>Controlled Clinical Trial*<br>Non-Randomized Controlled Trials as Topic*†<br>Randomized Controlled Trials as Topic*†<br>Randomized Controlled Trial*<br>Pragmatic Clinical Trials as Topic*†<br>Controlled Clinical Trial*<br>Randomized Controlled Trial*†<br>Pragmatic Clinical Trial*†<br>Cross-Over Studies*<br>Trial<br>Study                                  |

| Component | Term                  |
|-----------|-----------------------|
|           | Examination           |
|           | Exploratory           |
|           | Inquiry               |
|           | Design                |
|           | Approach              |
|           | Investigation         |
|           | Randomisation         |
|           | Randomised            |
|           | Randomization         |
|           | Randomized            |
|           | Cluster-randomisation |
|           | Cluster-randomization |
|           | Cluster-randomised    |
|           | Cluster-randomized    |
|           | Stepped wedge         |
|           | Stepped-wedge         |
|           | Quasi-experimental    |
|           | Experiment            |
|           | Pre-post              |
|           | Crossover             |

This table lists the controlled vocabulary and further search terms as an example for the database MEDLINE, other words than nouns will be integrated by means of truncation and/or other type of words.

\* Used as controlled vocabulary.

† Narrower term of already listed one.
