# Supplementary material for: Educational interventions to improve literature searching skills in the health sciences: a scoping review
Source: PubMed Central journal article supplement (PMC7524628; doi:10.5195/jmla.2020.954), 2020-10-01
Supplement: jmla-108-4-534-s03.pdf [file jmla-108-4-534-s03.pdf]

## Educational interventions to improve literature searching skills in the health sciences: a scoping review

Julian Hirt; Thomas Nordhausen; Jasmin Meichlinger; Volker Braun; Adelheid Zeller; Gabriele Meyer

### APPENDIX C

#### Characteristics, interventions, outcomes, and main results of included studies

| Reference               | Country | Design         | Setting    | Participants                                                  | Number | Female/<br>male | Age<br>(range,<br>M) | Intervention<br>group                                                                                                                      | Control group | Outcome measurement                                                                                                                                                                                                 | Time of<br>measurement                | Main results                                                                                                                                                                                                                                                                                      |
|-------------------------|---------|----------------|------------|---------------------------------------------------------------|--------|-----------------|----------------------|--------------------------------------------------------------------------------------------------------------------------------------------|---------------|---------------------------------------------------------------------------------------------------------------------------------------------------------------------------------------------------------------------|---------------------------------------|---------------------------------------------------------------------------------------------------------------------------------------------------------------------------------------------------------------------------------------------------------------------------------------------------|
| Sikora et al., 2019 [1] | Canada  | Pre-post trial | University | Undergraduate or graduate health sciences or medical students | 29     | NI              | NI                   | Scheduled individualized research consultations for students, performed by librarians                                                      | NA            | Self-developed information literacy rubric for scoring of open-ended questions regarding the use of appropriate keywords and search strategies (0=insufficient, 1=acceptable, 2=superior), rated by the last author | Baseline (T0), post-intervention (T1) | <u>Use of appropriate keywords</u><br>T0: M=1, SD=0.66<br>T1: M=1.34, SD=0.72 ( $p>0.05$ )<br><u>Use of appropriate search strategies</u><br>T0: M=0.21, SD=0.41<br>T1: M=0.76, SD=0.79 ( $p=0.001$ )                                                                                             |
| Hobbs et al., 2015 [2]  | USA     | Pre-post trial | University | Senior undergraduate radiologic science students              | 17     | NI              | NI                   | Library instruction on planning literature searches, developing search strategies, searching health-related and medicine-related databases | NA            | Questionnaire on knowledge and skills in information literacy developed by the health sciences librarian and the Radiologic Science Faculty (↑correctness), rating person(s) and rubric not described               | Baseline (T0), post-intervention (T1) | <u>Database search skills</u><br>T0: Correct=29.4%<br>T1: Correct=94.1%<br><u>Developing search strategies</u><br>T0: Correct=82.3%<br>T1: Correct=100%<br><u>Search concepts</u><br>T0: Correct=94.1%<br>T1: Correct=100%<br><u>Database selection</u><br>T0: Correct=17.6%<br>T1: Correct=64.7% |

| Reference                    | Country  | Design         | Setting    | Participants                   | Number              | Female/<br>male | Age<br>(range,<br>M) | Intervention<br>group                                                                                                                         | Control group                                                                                                         | Outcome measurement                                                                                                                                                                                                                                                                                                                                                                                                                                                                 | Time of<br>measurement                                                                                               | Main results                                                                                                                                                                                                                                                                                          |
|------------------------------|----------|----------------|------------|--------------------------------|---------------------|-----------------|----------------------|-----------------------------------------------------------------------------------------------------------------------------------------------|-----------------------------------------------------------------------------------------------------------------------|-------------------------------------------------------------------------------------------------------------------------------------------------------------------------------------------------------------------------------------------------------------------------------------------------------------------------------------------------------------------------------------------------------------------------------------------------------------------------------------|----------------------------------------------------------------------------------------------------------------------|-------------------------------------------------------------------------------------------------------------------------------------------------------------------------------------------------------------------------------------------------------------------------------------------------------|
| Qureshi et al., 2015 [3]     | Pakistan | Pre-post trial | University | Postgraduate dental students   | 42                  | 20/22           | NI                   | Workshop comprised 3 sessions of lectures and hands-on practice                                                                               | NA                                                                                                                    | Questions of the Fresno Test tool (where to find evidence, 0-6, excellent=6; able to search PubMed, 0-8, excellent=8), rating person(s) not described                                                                                                                                                                                                                                                                                                                               | Baseline (T0), post-intervention (T1)                                                                                | <u>Where to find evidence</u><br>T0: M=1.2, SD=1.5<br>T1: M=2.0, SD=1.6 ( $p=0.002$ )<br><u>Able to search PubMed</u><br>T0: M=0.2, SD=0.8<br>T1: M=1.6, SD=2.4 ( $p=0.003$ )                                                                                                                         |
| Brettle and Raynor, 2013 [4] | UK       | RCT            | University | Undergraduate nursing students | 55 (IG: 26; CG: 29) | NI              | 18-40, NI            | Online in-house information literacy tutorial (session 1) and follow-up information skills session (face-to-face) after one month (session 2) | Face-to-face session, delivered by the nursing subject librarian (session 1) and follow-up information skills session | Test of skills to search for evidence via CINAHL concerning specific research questions using a rubric identifying key features in the search strategy (scoring of use of synonyms, any truncation, correct Boolean OR, correct Boolean AND [each 1 point], correct keywords [1 point for each up to 3], additional feature; e.g., limits, nesting [1 point for each up to 2], 0-10, ↑correctness), rated independently by 2 researchers, disagreements resolved through discussion | Baseline session 1 (T0), post-intervention session 1 (T1), Baseline session 2 (T2), post-intervention session 2 (T3) | <u>IG</u><br>T0: M=0.35, SD=0.88<br>T1: M=1.77, SD=2.24<br>T0 vs. T1: $p=0.001$<br>T3: M=1.25, SD=1.48<br>T4: M=3.06, SD=1.7<br><u>CG</u><br>T1: M=2.23, SD=1.99<br>T0 vs. T1: $p<0.001$<br>T2: M=1.56, SD=1.54<br>T3: M=2.56, SD=1.86, SD=2.56<br><u>IG vs. CG</u><br>T0: $p=0.588$<br>T1: $p=0.263$ |

| Reference                      | Country | Design         | Setting    | Participants                                                | Number              | Female/<br>male | Age<br>(range,<br>M) | Intervention<br>group                                                                                               | Control group   | Outcome measurement                                                                                                                                                                                                                                                                            | Time of<br>measurement                                                        | Main results                                                                                                                                                                            |
|--------------------------------|---------|----------------|------------|-------------------------------------------------------------|---------------------|-----------------|----------------------|---------------------------------------------------------------------------------------------------------------------|-----------------|------------------------------------------------------------------------------------------------------------------------------------------------------------------------------------------------------------------------------------------------------------------------------------------------|-------------------------------------------------------------------------------|-----------------------------------------------------------------------------------------------------------------------------------------------------------------------------------------|
| Carlock and Anderson, 2007 [5] | USA     | CT             | University | Undergraduate nursing students                              | 90 (IG: 60; KG: 30) | 84/6            | 9-52, 27             | Librarian instruction including homework and in-class assignment                                                    | No intervention | Self-created rubric comparing the search history of a predefined search in CINAHL against the rubric measuring 5 criteria (subject heading search, selection of subject headings, use of subheadings, combining of terms, use of limits, 0-100%, ↑correctness), rating person(s) not described | Baseline (T0), post-intervention (T1)                                         | <u>IG</u><br>T0: M=60.6% T1: M=88%<br><u>CG</u><br>T0: M=45% T1: M=47%                                                                                                                  |
| Grant and Brettle, 2006 [6]    | UK      | Pre-post trial | University | Postgraduate students in research in health and social care | 13                  | NI              | NI                   | Self-developed web-based MEDLINE tutorial by an information specialist and tutor                                    | NA              | Modified Rosenberg assessment tool comprised a skills checklist (e.g., Boolean operators, MeSH/indexing terms, application of limits, and whether a manageable and relevant number references were retrieved, 1-16, ↑correctness), rating person(s) not described                              | Baseline (T0), post-intervention (T1), post-intervention (T2, 10 weeks later) | T0: M=4.58, SD=1.5<br>T1: M=6.45, SD=1.46<br>T2: M=9.70, SD=3.53<br>( <i>p</i> =0.001)<br>T0 vs. T1: <i>p</i> =0.04<br>T1 vs. T2: <i>p</i> =0.008                                       |
| Gruppen, et al., 2005 [7]      | USA     | CT             | University | Fourth-year medical students                                | 92 (IG: 34; CG: 58) | NI              | NI                   | Instructional intervention on EBM-based techniques for searching MEDLINE for evidence related to a clinical problem | No intervention | Structured clinical scenario (described in a publication) and scoring on literature search quality and search errors developed by librarians at the University of Michigan, based on a template designed by librarians at the University of Rochester (quality: score                          | Baseline (T0), post-intervention (T1, one month later)                        | <u>Quality score (overall)</u><br><u>IG</u><br>T0: M=59.8, SD=25.5<br>T1: M=72.5, SD=21.3 MD: 12.7, SD: 23.9<br><u>CG</u><br>T0: M=60, SD=21.2<br>T1: M=59.3, SD=16.9 MD: -0.7, SD=22.4 |

| Reference                        | Country | Design            | Setting                | Participants                  | Number | Female/<br>male | Age<br>(range,<br>M) | Intervention<br>group                                                                                                                                                 | Control group | Outcome measurement                                                                                                                                                                                                                                                                                                                                                                                                                                                                                                                                 | Time of<br>measurement                      | Main results                                                                                                                                                                                                                                             |
|----------------------------------|---------|-------------------|------------------------|-------------------------------|--------|-----------------|----------------------|-----------------------------------------------------------------------------------------------------------------------------------------------------------------------|---------------|-----------------------------------------------------------------------------------------------------------------------------------------------------------------------------------------------------------------------------------------------------------------------------------------------------------------------------------------------------------------------------------------------------------------------------------------------------------------------------------------------------------------------------------------------------|---------------------------------------------|----------------------------------------------------------------------------------------------------------------------------------------------------------------------------------------------------------------------------------------------------------|
|                                  |         |                   |                        |                               |        |                 |                      | taught by<br>medical<br>librarians                                                                                                                                    |               | max. 95, ↑quality; search<br>errors: ↓correctness), rated by<br>2 librarians                                                                                                                                                                                                                                                                                                                                                                                                                                                                        |                                             | IG vs. CG<br>T0, MD: -0.2 (95 % CI: -11.3<br>to 10.9, $p \geq 0.05$ )<br>T1: MD: 13.2 (95 % CI: 4.1 to<br>22.3, $p < 0.05$ )<br><u>Search errors (total)</u><br>IG: M=4.4, SD=3.3 CG:<br>M=6.2, SD=2.8<br>MD: -1.8, 95 % CI: -0.4 to<br>-3.2, $p < 0.05$ |
| Rosenfeld<br>et al., 2002<br>[8] | USA     | Pre-post<br>trial | Intensive<br>care unit | Intensive care<br>unit nurses | 36     | NI              | 20->50,<br>NI        | Educational<br>sessions<br>complemented<br>by a web-<br>tutorial<br>regarding<br>information<br>literacy<br>competencies,<br>performed by<br>the medical<br>librarian | NA            | Self-defined, point-based<br>competency rating scale<br>(executing a search, proper<br>use of subject headings, use<br>of focusing [each 1 point],<br>searching more than 1<br>database [3 points], using<br>limits and Boolean operators<br>[2 points], using keywords if<br>no subject heading existed or<br>in addition to subject<br>headings [1 point], improper<br>use of commands [minus 1<br>point], 0=no competency,<br>1-3=beginner,<br>4-6=intermediate,<br>7-9=advanced), each search<br>rated by 2 medical librarians<br>independently | Baseline (T0),<br>post-intervention<br>(T1) | T0<br>No competency: n=35<br>Intermediate: n=1<br>T1<br>No competency: n=21<br>Beginner: n=4<br>Intermediate: n=4<br>Advanced: n=3<br>Note: some of the data on<br>searches were lost when the<br>medical library server<br>crashed.                     |

| Reference                 | Country   | Design         | Setting    | Participants                                                    | Number                 | Female/<br>male | Age<br>(range,<br>M) | Intervention<br>group                              | Control group   | Outcome measurement                                                                                                                                                                                                                                                                                                   | Time of<br>measurement                                                                                                    | Main results                                                                                                                                                                                                                                                                                                             |
|---------------------------|-----------|----------------|------------|-----------------------------------------------------------------|------------------------|-----------------|----------------------|----------------------------------------------------|-----------------|-----------------------------------------------------------------------------------------------------------------------------------------------------------------------------------------------------------------------------------------------------------------------------------------------------------------------|---------------------------------------------------------------------------------------------------------------------------|--------------------------------------------------------------------------------------------------------------------------------------------------------------------------------------------------------------------------------------------------------------------------------------------------------------------------|
| Vogel et al., 2002 [9]    | USA       | Pre-post trial | Hospital   | Second-year medicine residents                                  | 42                     | 26/16           | 30                   | Workshop on using Ovid's version of MEDLINE        | NA              | Participants completed the MEDLINE performance checklist (documentation of searching, relevance of retrieved citations [each 2 items], and searching strategies [6 items], each item rated as correct [fulfilled at least once per search] or incorrect), rated by the first author (assistant professor of medicine) | Baseline (T0), post-intervention (T1, directly after workshop), and post-intervention (T2, 1 to 11 months after workshop) | Significantly higher percentage of residents correctly used MEDLINE searching skills ( $p < 0.05$ )<br>Note: only $p$ values available.                                                                                                                                                                                  |
| Wallace et al., 2000 [10] | Australia | CT             | University | Undergraduate nursing, health, and behavioral sciences students | 300 (IG: 100; CG: 200) | NI              | NI                   | Curriculum-integrated information literacy program | No intervention | Objective test of library catalog skills regarding 5 domains (selecting suitable command, responding to command appropriately, selecting appropriate information source, locating journal article, using citation to locate article [1 point each domain], score 0-5, ↑skills), rating person(s) not described        | Baseline (T0), post-intervention (T1)                                                                                     | <u>IG</u><br>T0, M: 1.85<br>T1, M: 3.41<br><u>CG</u><br>T0, M: 1.85<br>T1, M: 2.36<br>Number of students who performed better, worse, or equal (matched results between baseline and post-intervention):<br>Baseline > post-intervention: n=3<br>Baseline < post-intervention: n=51<br>Baseline = post-intervention: n=1 |

| Reference                      | Country | Design         | Setting    | Participants                           | Number                      | Female/<br>male | Age<br>(range,<br>M) | Intervention<br>group                                                                                                                                                     | Control group                                                                                       | Outcome measurement                                                                                                                                                                                                                                                              | Time of<br>measurement                                            | Main results                                                                                                                                                              |
|--------------------------------|---------|----------------|------------|----------------------------------------|-----------------------------|-----------------|----------------------|---------------------------------------------------------------------------------------------------------------------------------------------------------------------------|-----------------------------------------------------------------------------------------------------|----------------------------------------------------------------------------------------------------------------------------------------------------------------------------------------------------------------------------------------------------------------------------------|-------------------------------------------------------------------|---------------------------------------------------------------------------------------------------------------------------------------------------------------------------|
| Erickson and Warner, 1998 [11] | USA     | RCT            | Hospital   | Residents in obstetrics and gynecology | 31 (IG1: 11; IG2: 12; CG:8) | 15/16           | NI                   | IG1<br>Hands-on tutorial session on the use of MEDLINE by health sciences librarian with hands-on instruction<br><br>No intervention                                      | IG2<br>Tutorial on the use of MEDLINE at prescribed sessions performed by health sciences librarian | MEDLINE search recall and precision rates of 4 searches, rated by faculty members                                                                                                                                                                                                | Baseline (T0: searches 1+2), post-intervention (T1: searches 3+4) | <u>Recall IG1</u><br>T0, M: 16%<br>T1, M: 16%<br>(no statistical significance)<br><u>IG2</u><br>T0, M: 21%<br>T1, M: 28%<br>(no statistical significance)<br><u>CG</u>    |
| Grant et al., 1996 [12]        | USA     | Pre-post trial | University | Pharmacy students                      | 48                          | NI              | NI                   | Lecture on systematic approach in combination with an online demonstration with Ovid to develop search strategies and homework assignments to perform a literature search | NA                                                                                                  | Evaluation of 2 written search strategies (1 sensitive, 1 specific) concerning a predefined research question by pre-established scoring criteria (0-20, ↑correctness), rated by study authors (profession not described); different research question for each evaluation point | Baseline (T0), post-intervention (11 weeks later)                 | <u>Creating sensitive search strategy</u><br>T0: 8.2, SD=2.2<br>T1: M=19.1, SD=1.6<br><u>Creating specific search strategy</u><br>T0: M=5.7, SD=3.3<br>T1: M=17.7, SD=3.3 |

| Reference                         | Country | Design         | Setting    | Participants                          | Number                 | Female/<br>male | Age<br>(range,<br>M) | Intervention<br>group                                                            | Control group   | Outcome measurement                                                                                                                                                                                                                                                                                          | Time of<br>measurement                                                                                                    | Main results                                                                                                                                                        |
|-----------------------------------|---------|----------------|------------|---------------------------------------|------------------------|-----------------|----------------------|----------------------------------------------------------------------------------|-----------------|--------------------------------------------------------------------------------------------------------------------------------------------------------------------------------------------------------------------------------------------------------------------------------------------------------------|---------------------------------------------------------------------------------------------------------------------------|---------------------------------------------------------------------------------------------------------------------------------------------------------------------|
| Haynes et al., 1993 [13]          | Canada  | RCT            | Hospital   | Physicians and physicians-in-training | 264 (IG: 130; CG: 134) | NI              | NI                   | Feedback on the first 10 searches and assignment by a clinical MEDLINE preceptor | No intervention | Participants performed 10 MEDLINE searches concerning individual research questions; the percentage of successful searches was defined if at least 1 relevant reference was retrieved (score 5-7 on 1-7 relevance scale, ↑relevance), evaluated for 1st, 4th, and 8th search, relevance rated by a clinician | Baseline (T0, after the first search), post-intervention (T1, after 4 searches), post-intervention (T2, after 8 searches) | <u>IG</u><br>T0: 65%<br>T1: 71%<br>T2: 80%<br><u>CG</u><br>T0: 65%<br>T1: 75%<br>T2: 72%                                                                            |
| Bradigan and Mularski (1989) [14] | USA     | Pre-post trial | University | Second-year medical students          | 9                      | NI              | NI                   | Mini module courses performed by 2 librarian instructors                         | NA              | Number of correct answers, 3 questions on the ability to extract important concepts in a statement of a medical problem to be searched online (5 questions on the use of Boolean/proximity operators, 1=correct answer, 0=incorrect answer, ↑correctness), rating person(s) not described                    | Baseline (T0), post-intervention (T1)                                                                                     | <u>Ability to extract important concepts (total)</u><br>T0: M: .88<br>T1: M: 3<br><u>Use of Boolean and proximity operators (total)</u><br>T0: M=2.33<br>T1: M=4.77 |

Abbreviations: CT=Controlled trial; CG=Control group; CI=Confidence interval; EBM=Evidence-based medicine; IG=Intervention group; M=Mean; MD=Mean difference; MeSH=Medical Subject Headings; NA=Not applicable; NI=No information available; p=p value; OR=Odds ratio; RCT=Randomized controlled trial; SD=Standard deviation; SE=Standard error; T0=Baseline measurement; T1=Post-intervention measurement; vs=Versus.

Notes: ↑/↓=higher values indicate better outcomes; Underlined outcomes in case of multiple outcomes per study.

## REFERENCES

1. Sikora L, Fournier K, Rebner J. Exploring the impact of individualized research consultations using pre and posttesting in an academic library: a mixed methods study. *Evid Based Libr Inf Pract*. 2019;14(1):2–21. DOI: <http://dx.doi.org/10.18438/eblip29500>.
2. Hobbs DL, Guo R, Mickelsen W, Wertz CI. Assessment of library instruction to develop student information literacy skills. *Radiol Technol*. 2015 Jan–Feb;86(3):344–9.
3. Qureshi A, Bokhari SAH, Pirvani M, Dawani N. Understanding and practice of evidence based search strategy among postgraduate dental students: a preliminary study. *J Evid Based Dent Pract*. 2015 Jun;15(2):44–9.
4. Brettle A, Raynor M. Developing information literacy skills in pre-registration nurses: an experimental study of teaching methods. *Nurse Educ Today*. 2013 Feb;33(2):103–9.
5. Carlock D, Anderson J. Teaching and assessing the database searching skills of student nurses. *Nurs Educ*. 2007 Nov–Dec;32(6):251–5.
6. Grant MJ, Brettle AJ. Developing and evaluating an interactive information skills tutorial. *Health Inf Libr J*. 2006 Jun;23(2):79–86.
7. Gruppen LD, Rana GK, Arndt TS. A controlled comparison study of the efficacy of training medical students in evidence-based medicine literature searching skills. *Acad Med*. 2005 Oct;80(10):940–4.
8. Rosenfeld P, Salazar-Riera N, Vieira D. Piloting an information literacy program for staff nurses: lessons learned. *Comput Inform Nurs*. 2002 Nov–Dec;20(6):236–41.
9. Vogel EW, Block KR, Wallingford KT. Finding the evidence: teaching medical residents to search MEDLINE. *J Med Libr Assoc*. 2002 Jul;90(3):327–30.
10. Wallace MC, Shorten A, Crookes PA. Teaching information literacy skills: an evaluation. *Nurse Educ Today*. 2000 Aug;20(6):485–9.
11. Erickson S, Warner ER. The impact of an individual tutorial session on MEDLINE use among obstetrics and gynaecology residents in an academic training programme: a randomized trial. *Med Educ*. 1998 May;32(3):269–73.
12. Grant KL, Herrier RN, Armstrong EP. Teaching a systematic search strategy improves literature retrieval skills of pharmacy students. *Am J Pharm Educ*. 1996;60(3):281–6.
13. Haynes RB, Johnston ME, McKibbin KA, Walker CJ, Willan AR. A program to enhance clinical use of MEDLINE. a randomized controlled trial. *Online J Curr Clin Trials*. 1993 May 11;doc no. 56.
14. Bradigan PS, Mularski CA. End-user searching in a medical school curriculum: an evaluated modular approach. *Bull Med Libr Assoc*. 1989 Oct;77(4):348–56.
